# Supplementary material
Source: publisher figshare collection journal article supplement (https://rs.figshare.com/ndownloader/files/35753958)
Supplement: Supplementary file 1 [file 35753958]

## Sheet: bak_220510_hormonesfathers_sens
Study	Hadintervention	Education_Father	Mean_CTSz_CRPBIz	Mean_sensz_coopz_2mo	OT_AUC_2mo_winsor	Cort_AUC_2mo_winsor	Estradiol_AUC_2mo_winsor	Testo_AUC_2mo_winsor	AVP_AUC_2mo_winsor	Testo_AUC_xEstradiol_AUC_2mo_winsor	Estradiol_AUC_2mo_winsortri
1	1	10	2.3292	0.739768	41.0112	173.326	64.0796	2753.17	45.9493	-2678.75	1
1	0	10	-0.826529	0.243592	64.9088	68.8134	62.4504	2155.32	63.6072	34404.4	1
1	1	9	0.389883	0.406805	74	69.8523	71.6291	1573.13	78.5481	60160.3	1
1	0	10	-0.579276	-0.0893714	62.3214	165.419	75.5618	2160.09	69.334	26911.7	1
1	1	9	0.356688	0.899711	35.3523	159.359	54.7521	2264.93	46.4893	31009.9	1
1	1	9	0.307135	-0.419066	36.1243	101.232	32.4443	1851.08	47.8176	79052	1
1	1	10	1.52652	0.573286	39.0106	257.264	39.3043	1492.67	41.1555	103738	1
1	0	6	-0.997473	0.566747	36.121	233.612	64.2977	2089.79	40.1894	37332.7	1
1	0	9	1.00925	1.22614	33.3999	112.452	71.5544	1415.87	45.7681	68586.8	1
1	1	6	-0.17001	0.237053	41.6732	79.8378	70.4225	1724.29	43.2136	53342	1
1	1	9	-0.342444	0.253401	52.4471	282.074	48.5785	2253.8	47.6467	34597.1	1
1	1	9	0.885879	1.72558	55.1444	199.936	57.8071	2656.22	57.0697	3519.07	1
1	1	9	0.245695	-1.40161	42.0701	105.727	41.8073	1831.08	41.6857	72675.7	1
1	0	9	-0.547572	-0.918511	46.686	127.538	53.7942	2984.97	52.9049	-19546	1
1	0	10	0.261564	0.243592	28.2923	201.662	64.3808	2996.67	42.8809	-17328.2	1
1	0	10	-1.03513	-0.409257	30.2901	181.656	60.7537	1993.04	35.1527	45704.1	1
1	1	9	-0.30429	0.576556	33.5038	269.888	68.7302	2187.1	45.2426	29152.1	1
1	1	10	0.244204	1.56237	43.1961	90.5803	74.0641	2203.44	43.925	25543	1
1	1	9	0.218462	-0.742221	45.0292	225.881	71.7866	2856.53	40.4786	-7795.79	1
1	0	10	-0.62437	0.90298	47.3947	149.841	56.1299	1851.91	59.8607	58676.9	1
1	1	6	-0.457886	-0.74549	43.175	347.082	62.9261	1159.72	52.9474	95541.2	1
1	1	10	-0.942471	0.576556	40.7955	176.319	49.0974	3090.03	45.1083	-28774.9	1
1	1	9	-0.00104559	-1.07518	49.2899	217.876	59.1047	2460.13	53.3492	16293.6	1
1	0	9	1.27829	-0.0828324	45.4835	168.807	61.5015	2262.97	52.1363	28137.3	1
2	0	3	0.158488	-1.2384	55.469	58.2514	59.5111	853.976	50.0738	120731	1
2	0	10	-0.678871	-0.252584	47.7763	55.463	65.0567	1863.39	53.3146	50343.2	1
2	0	9	-0.834458	-1.07845	60.9622	69.8472	79.5237	677.385	36.8171	91568.9	1
2	0	6	2.30145	0.25667	54.5578	43.4941	35.2915	1049.18	46.3824	148224	1
2	0	9	-0.214102	0.570017	73.1255	95.8256	42.2423	1595.68	52.8864	91680.7	1
2	0	9	-0.265243	0.733229	55.9643	91.6729	69.1576	1784.25	70.724	51263.4	1
2	0	6	0.314575	0.243592	62.9243	33.3567	56.1411	1272.69	39.7336	98318.6	1
2	0	10	-0.978146	0.743038	44.2705	280.116	62.9763	2098.96	39.2174	37586	1
2	0	10	-0.457886	-0.409257	51.2108	50.9764	59.5647	791.926	37.8338	124667	1
2	0	6	-1.01085	-1.73457	62.5226	37.2968	56.5086	944.148	52.6625	120161	1
2	0	9	-0.935043	-0.0828324	57.1168	99.3701	55.3805	1747.2	58.5707	66566.7	1
2	0	9	0.435477	-1.73457	51.8318	146.913	57.3336	5985.38	54.1821	-220389	1
2	0	10	-0.400547	1.22941	41.1093	55.5259	55.8522	2464.15	79.3133	16826.3	1
2	0	10	-0.0382104	0.250131	45.4222	62.5791	74.1078	2344.29	53.8634	18409.5	1
2	0	9	-0.526766	-1.40161	48.8569	121.306	55.3765	1883.07	56.9211	57165.4	1
2	0	6	-0.809682	-0.5692	37.2036	190.781	61.5632	1268.07	60.4993	90822.8	1
2	0	6	-0.673423	-0.0926409	59.6575	62.1013	69.9907	1215.97	51.0119	81524.9	1
2	0	6	-0.921164	-0.255853	60.7449	136.645	61.8843	2208.15	63.6732	31404.5	1
2	0	9	0.166918	1.72558	48.3613	41.0384	62.2959	1405.62	86.4401	81197.4	1
2	0	10	0.451323	-0.0828324	33.9046	31.8943	28.3393	1042.27	68.9138	160428	1
2	0	9	0.237277	-1.56809	51.82	31.9758	58.6897	544.338	89	142663	1
2	0	9	-1.1045	1.40243	44.5847	186.806	78.145	2221.13	49.8413	22658.6	1
2	0	6	1.02905	-1.24167	40.5509	51.5956	49.0165	752.143	45.1897	147895	1
2	0	9	-0.291902	-0.908702	35.2384	141.646	69.0179	2163.54	70.299	30311.6	1
2	0	10	-0.0857723	0.237053	44.4985	269.553	73.5696	2441.72	46.9653	13634.1	1
2	0	6	-0.390006	-1.40815	45.7248	51.4297	66.0737	2046.48	78.1772	38768	1
1	1	6	-0.242849	-1.07518	57.601	96.2775	123.782	2517.61	56.0366	156.008	2
1	0	10	-0.22996	0.576556	56.137	104.853	130.563	2045.85	54.9408	-3955.31	2
1	1	9	0.0906205	-0.415796	52.7957	86.3022	120.545	2428.64	53.77	1135.88	2
1	1	10	0.590563	0.400266	42.1953	195.019	91.8692	2384.22	46.1773	10626.6	2
1	0	9	-0.655585	-1.40488	36.6529	175.062	92.0624	5584.99	53.1433	-93574.2	2
1	0	10	-1.02076	-0.825462	40.8267	121.429	116.338	3110.42	53.1053	-3316.43	2
1	0	6	0.406229	0.0771104	60.7632	90.9686	120.538	1954.4	61.3713	3063.1	2
1	0	10	1.64	0.413344	39.7377	173.628	123.642	3063.09	53.8206	-338.632	2
1	0	6	-0.476224	-0.582278	53.5111	130.68	129.383	2766.58	55.33	275.989	2
1	0	10	0.062875	0.909519	48.381	219.211	86.6498	2966.11	56.2123	-9760.03	2
1	0	9	-0.472253	-0.582278	50.9088	272.688	98.6054	2923.53	47.9283	-5578.48	2
1	1	9	-0.641218	0.0803799	52.399	111.503	123.305	2542.44	50.5767	215.187	2
1	1	10	1.2233	-0.0232113	52.3903	121.988	121.94	2707.76	55.069	3.05399	2
1	0	10	-0.574829	-0.0893714	42.7594	128.506	126.684	2627.79	56.2115	-169.279	2
1	0	9	0.389883	2.22176	41.6586	228.403	87.1913	5829.03	48.6862	-116712	2
1	0	10	0.556856	-2.14751	57.0231	133.624	93.5972	1990.63	50.6428	22267	2
1	1	6	0.554889	0.074156	50.967	160.477	103.658	2324.33	52.68	8052.92	2
1	0	9	-0.214114	-1.23186	37.0408	193.309	107.432	3486.14	51.9658	-13341.5	2
1	1	9	2.87324	-0.742221	42.5635	76.4486	84.3927	3013.79	48.0029	-12257.5	2
1	0	10	0.282371	1.076	55.6774	114.435	102.617	1916.22	43.5713	17423.7	2
1	1	9	0.0410674	-0.0828324	38.5898	62.0971	133.309	4049.19	35.6755	11675.4	2
1	1	6	0.253135	-0.106118	51.5665	151.036	126.762	2706.29	54.9861	-5.67316	2
1	1	9	-0.115998	-0.74549	44.2353	111.586	98.8647	3217.42	48.7114	-13085.5	2
2	0	9	-0.540633	-1.24167	47.6748	71.8352	86.1449	3030.67	44.5792	-12372.6	2
2	0	6	1.54041	0.246862	55.25	96.9269	122.898	2099.86	53.6749	1035.04	2
2	0	6	1.3754	1.06292	66.8785	110.009	104.125	896.802	48.9228	37098.8	2
2	0	9	2.16867	0.576556	66.0866	219.515	91.7221	3650.86	75.089	-30967.3	2
2	0	6	2.38717	-0.249314	54.1516	144.179	112.869	2377.78	53.1174	3883.7	2
2	0	6	-0.457886	-0.74549	73.1682	154.804	133.238	5058.09	49.3195	20298.8	2
2	0	10	2.90148	0.576556	53.2225	74.2056	97.2574	2416.91	44.0932	7983.24	2
2	0	6	-0.201225	0.573286	55.0121	38.9429	119.917	2466.4	38.8243	1135.16	2
2	0	10	0.0985495	0.743038	46.6121	48.2418	121.693	1300.57	56.1512	4090.34	2
2	0	3	0.892305	-0.0143043	49.0186	227.729	101.749	1860.75	73.9663	19379.5	2
2	0	8.44944	-0.0188219	-0.742221	47.8123	133.515	128.097	2934.25	52.2615	788.607	2
2	0	10	-0.222532	0.909519	45.919	72.8717	79.9241	1927.34	54.3878	34915.7	2
2	0	10	-0.678871	-0.0828324	36.314	68.5917	111.356	1941.73	63.0325	10158.7	2
2	0	6	-0.864183	0.406805	39.9956	153.447	80.7312	1967.74	71.1172	32512.3	2
2	0	9	-0.11105	-0.409257	47.5001	125.328	105.151	1985.27	57.9253	14072.2	2
2	0	9	0.53109	-0.409257	61.9889	222.614	102.578	2915.8	55.5542	-4555.59	2
2	0	6	-0.0517503	-0.908702	38.0805	57.3508	86.8884	1397.51	62.6551	49451.9	2
2	0	10	-0.284962	1.39589	53.7001	18.7495	80.3889	1678.44	81.0818	45556.1	2
2	0	10	-1.09211	1.06619	51.2883	307.85	133.203	3862.41	39.1806	9926.25	2
2	0	6	-1.14909	0.413344	30.479	33.9979	119.389	1357.44	52.8496	7038.81	2
2	0	9	-0.921164	-1.40815	41.8482	161.005	101.236	3074.2	67.661	-8533.91	2
2	0	6	-0.0981725	0.0738409	55.1336	168.285	111.284	2682.44	63.2177	352.396	2
2	0	10	-0.963778	0.570017	47.3168	180.696	104.879	3207.91	70.6091	-9839.66	2
2	0	10	-0.856755	-0.415796	42.6264	39.7345	132.208	1553.86	60.4496	-8790.7	2
2	0	9	-0.277534	0.243592	41.2233	155.308	82.9748	2159.78	60.9318	22856.5	2
2	0	9	0.524162	0.243592	60.4608	125.535	122.593	2594.5	77.0414	229.316	2
2	0	10	0.751074	-1.57136	57.5345	187.246	82.1854	2071.72	46.9331	27024.8	2
2	0	10	-0.699921	-1.40815	50.4253	147.26	108.458	2953.92	60.0624	-3954.37	2
1	0	9	0.139649	-0.0828324	46.6469	95.1811	146.874	3613.43	46.6629	20149.3	3
1	0	10	0.235798	0.736499	58.176	87.5007	219.581	2781.71	62.7987	6915.14	3
1	1	10	1.37441	0.746307	56.4221	180.279	241.579	2925.16	48.349	25297.3	3
1	0	9	-0.765589	-1.40161	53.3492	234.936	161.915	4009.66	57.0027	48540.7	3
1	0	9	-0.222043	0.406805	42.2602	132.664	164.927	4147.65	46.4337	58022.9	3
1	1	9	1.18862	1.06292	41.5882	255.794	176.29	3127.5	50.4692	21637.6	3
1	0	10	-0.405375	0.0705714	38.7716	202.439	245.02	4110.94	56.5802	168837	3
1	0	9	-0.553522	-1.73457	42.0112	144.126	355	5444.53	49.5197	630292	3
1	1	9	-0.348382	-0.0861019	46.4205	115.075	344.895	2907.39	47.4114	43725.7	3
1	0	10	1.46708	0.410074	39.9146	315.353	183.418	3828.02	50.9536	65826.4	3
1	1	9	2.38124	-0.572469	56.3676	188.389	350	5357.45	51.2964	596986	3
1	0	6	0.163949	-1.08172	43.115	144.37	324.724	5631.23	55.8304	584832	3
1	0	9	-0.275054	-0.246045	45.055	186.756	176.251	3291.13	51.0689	30073.5	3
1	1	10	1.40415	-0.915241	63.1724	108.288	135.903	4098.38	58.4923	15709	3
1	1	6	-0.284962	0.90625	52.4636	308.084	218.84	3203.7	52.0489	46630.2	3
1	0	6	0.071281	-0.742221	42.7838	224.034	230.151	4239.67	48.3132	161577	3
1	1	10	-0.789865	0.909519	34.3418	130.629	133.471	3235.78	48.5409	4675.19	3
1	1	10	0.66091	0.90298	62.5129	95.9595	227.011	3079.56	61.5929	37960	3
1	0	10	-1.02076	0.576556	30.0725	133.93	243.903	3330.18	42.2032	74120.7	3
1	0	10	-0.663514	0.243592	43.548	106.152	200.487	2960.41	38.9149	19086.4	3
1	1	9	-0.418253	0.0771104	41.8681	210.58	140.515	2571.84	53.2174	-2181.83	3
1	1	9	-0.657565	0.576556	45.9763	48.2191	160.012	2765.37	51.8674	1999.46	3
1	1	6	0.419619	0.583095	53.4173	177.11	243.311	3664.33	54.0569	113421	3
1	1	6	-0.128398	-1.73457	54.4947	67.9664	146.58	3299.87	57.0463	12990.6	3
1	1	6	-0.17695	-0.915241	47.76	137.551	139.832	2787.96	59.8865	1204.26	3
1	1	9	0.453303	2.38497	36.4436	204.913	148.346	2154.85	52.9596	-13158.2	3
2	0	9	-1.02522	0.243592	51.4807	141.349	196.729	2670.99	47.0724	-2735.39	3
2	0	6	0.621289	-1.07518	54.1782	52.71	251.615	3569.36	39.487	109292	3
2	0	9	-0.559961	-0.742221	56.6842	14.0959	160.005	437.642	45.3749	-80419.2	3
2	0	9	1.05681	0.416613	39.8103	22.7085	202.028	2957.33	45.6579	19235.5	3
2	0	6	-0.0733841	-0.246045	38.1944	164.012	159.832	3433.71	51.226	25537.7	3
2	0	10	-0.8845	1.56237	50.3597	116.298	134.587	3679.69	57.3692	9697.17	3
2	0	9	0.0985495	-0.412527	41.5392	185.956	170.007	2519.15	56.6553	-8617	3
2	0	6	-0.123426	-1.07191	34.9289	93.8869	158.232	2621.22	50.5193	-2949.5	3
2	0	10	-1.11341	-0.0828324	56.6107	127.031	250.521	5041.94	47.7259	293783	3
2	0	10	-1.14909	2.05528	53.3604	76.3229	189.815	3101.36	42.8612	25594.4	3
2	0	6	0.123803	-0.415796	73.1488	31.7866	300.589	6162.74	66.6076	607843	3
2	0	9	-0.415272	-0.415796	51.8552	53.8103	151.35	1391.5	65.6964	-35243.7	3
2	0	9	-0.906797	-1.07191	45.3996	58.7171	316.277	6700	60.4602	765010	3
2	0	9	-0.18092	-0.249314	68.6512	84.5789	285.297	2657.79	79.6422	-8215.69	3
2	0	9	-0.49257	0.243592	44.6095	67.1641	152.5	2192.52	64.7484	-14408.4	3
2	0	6	0.881407	1.06946	50.7606	140.492	177.823	2394.07	53.8912	-16757.6	3
2	0	10	-0.803243	0.243592	52.5213	116.208	182.578	2092.04	43.6958	-35766.5	3
2	0	10	-0.0159258	1.39589	48.6047	120.188	175.923	3238.33	74.9802	27172.4	3
2	0	10	-0.785501	0.243592	34.4178	163.121	200.723	6169.76	62.0983	263457	3
2	0	9	-0.325597	0.743038	50.7623	138.546	165.299	6427.06	69.0729	151332	3
2	0	9	-0.557481	0.573286	41.8709	152.948	162.112	2434.7	72.567	-10286.8	3
2	0	10	-0.341455	1.06292	41.891	206.411	156.384	2941.45	74.1286	7391.67	3
2	0	6	-0.321638	-1.06865	48.243	261.512	289.595	5960.03	46.2005	536427	3
2	0	10	0.261564	0.90298	71.7151	190.092	234.814	3457.62	62.1361	82520.6	3
2	0	9	-0.921164	1.56237	45.9851	326.683	146.745	2414.22	55.2863	-6526.45	3
